# Supplementary material
Source: publisher site journal article supplement (https://static.cambridge.org/content/id/urn:cambridge.org:id:article:S0959270920000106/resource/name/S0959270920000106supp001.docx)
Supplement: Supplementary file 1 [file S0959270920000106supp001.docx]

**Supplementary Material**

Phylogeography of the rare Australian endemic Grey Falcon *Falco hypoleucos*: implications for conservation

DALE W. MULLIN, GRAHAM A. MCCULLOCH, JONNY SCHOENJAHN, GIMME H. WALTER

**Contents**

Table S1. Collection details of Grey Falcon feathers analysed in this study.

Appendix S1. Permit information: Details of the permits required to both collect and transport feathers.

Table S1. Collection details of Grey Falcon feathers analysed in this study. NT, Northern Territory; Qld, Queensland; SA, South Australia; WA, Western Australia.

| **Feather Code** | **Locality** | **Date of Collection** |
| --- | --- | --- |
| GFA | NW Pilbara, WA | 9/09/2016 |
| GFB | Pilbara, WA | 28/07/2008 |
| GFC | Central Pilbara, WA | 1/03/2017 |
| GFD | Pilbara, WA | 1/04/2008 |
| GFE | Central Pilbara, WA | 27/02/2017 |
| GFF | Channel Country, Qld | 16/09/2010 |
| GFG | Pilbara, WA | 28/09/2009 |
| GFH | Central Pilbara, WA | 18/03/2017 |
| GHI | W Simpson Desert, NT | 06/10/2016 |
| GHJ | NE Pilbara, WA | 24/05/2016 |
| GHK | W Simpson Desert, NT | 30/09/2015 |
| GHL | Strzelecki Desert, SA | 18/09/2015 |
| GHM | Barkly Tableland, NW Qld | 15/10/2014 |
| GHN | Channel Country, Qld | 07/10/2014 |
| GHO | Birdum Creek, NT | 08/09/2014 |
| GHP | Ashburton River, Pilbara, WA | 10/09/2016 |
| GHQ | N Pilbara, WA | 05/09/2012 |
| GHR | Channel Country, Qld | 19/09/2011 |
| GHS | Barkly Tableland, NT | 09/10/2010 |
| GHT | Channel Country, Qld | 03/10/2010 |
| GHU | Channel Country, Qld | 02/10/2010 |
| GHV | Channel Country, Qld | 02/10/2010 |
| GHW | Strzelecki Desert, SA | 01/10/2010 |
| GHX | Channel Country, Qld | 16/09/2010 |
| GHY | Channel Country, Qld | 11/09/2010 |
| GHZ | Barkly Tableland, Qld | 19/09/2009 |

**Appendix S1.** Permit Information: Details of the permits required to both collect and transport feathers.

Thanks to the Parks and Wildlife Services of Western Australia and the Queensland Department of Environment Heritage and Protection for providing movement permits to move send feathers across state boundaries.

Fieldwork was carried out by JS under the licences, permits and animal-ethics (AEC) approvals that are required for the States and Territory concerned, held since 2004. In March 2017, the following items were current. New South Wales: Scientific Licence number SL100095, NSW National Parks and Wildlife Service; Animal Research Authority number 16/350, and Animal Care and Ethics Committee of the Secretary NSW Industry, Skills and Regional Development approval number 16/350, NSW Department of Primary Industries. Northern Territory: Licence to Use Premises for Teaching or Research involving Animals number 029, Animal Welfare Authority; AEC approval number A12018, AEC of Charles Darwin University, Darwin; Permit to Interfere with Wildlife for Commercial Purposes number 58715, Parks and Wildlife Commission Northern Territory; Benefit Sharing Deed number COM2003/203:JGS, Department of Primary Industry and Resources. Queensland: Scientific Use Registration number 168, Department of Agriculture and Fisheries; DAF AEC number CA 2016/04/955, Department of Agriculture and Fisheries; Scientific Purpose Permits WITK14626114 and WISP14626214, Department of Environment and Heritage Protection; AEC approval number SBS/308/14, The University of Queensland. South Australia: Permit to Undertake Scientific Research number C24781-14, Licence for Teaching, Research or Experimentation involving Animals number 135, and Wildlife Ethics Committee approval number 13/2016, Department of Environment, Water and Natural Resources. Western Australia: Licence to Take Fauna for Scientific Purposes (Reg. 17) number 01-000066-1, and Licence to Take and Mark Fauna for Research Purposes (Reg. 23) number BB003679, Department of Parks and Wildlife; Licence to Use Animals for Scientific Purposes number U 224/2017, Department of Agriculture and Food. Federal: Banding Authority, Class: A, Type: Bird (including approval to undertake colour marking), number 2484, ABBBS, Department of Sustainability, Environment, Water, Population and Communities, Australian Government, Canberra.
